# Supplementary material
Source: PubMed Central journal article supplement (PMC8727793)
Supplement: ajcr0011-6074-f7.pdf [file ajcr0011-6074-f7.pdf]

# Real-world cardiovascular toxicity of immune checkpoint inhibitors

**Supplementary Table 1.** Commonly used immune checkpoint inhibitors

| Drug                     | Drug target | Approval agency | The usual dose and cycle of the drug |
|--------------------------|-------------|-----------------|--------------------------------------|
| Camrelizumab             | PD-1        | NMPA            | 200 mg IV Q3W                        |
| Tislelizumab             | PD-1        | NMPA            | 3 mg/kg IV Q2W                       |
| Pembrolizumab (Keytruda) | PD-1        | FDA, NMPA       | 2 mg/kg IV Q3W                       |
| Toripalimab              | PD-1        | NMPA            | 3 mg/kg IV Q2W                       |
| Durvalumab               | PD-L1       | FDA, NMPA       | 10 mg/kg IV Q2W                      |
| Navulumab (Opdivo)       | PD-1        | FDA, NMPA       | 3 mg/kg IV Q2W                       |
| Sintilimab               | PD-1        | NMPA            | 200 mg IV Q3W                        |

Abbreviations: FDA, Food and Drug Administration (United States); NMPA, National Medical Products Administration (China).

**Supplementary Table 2.** Commonly used traditional chemotherapy drugs

| Drug               | The usual dose and cycle of the drug |
|--------------------|--------------------------------------|
| Docetaxel          | 75 mg/m <sup>2</sup> IV Q3W          |
| Pemetrexed         | 500 mg/m <sup>2</sup> IV Q3W         |
| Nedaplatin         | 75 mg/m <sup>2</sup> IV Q3W          |
| Etoposide          | 150 mg (D1-D3) IV Q3W                |
| Gemcitabine        | 1250 mg/m <sup>2</sup> (D1) IV Q3W   |
| Paclitaxel-albumin | 260 mg/m <sup>2</sup> D1 IV Q3W      |
| Paclitaxel         | 100 mg/m <sup>2</sup> IV Q3W         |

**Supplementary Table 3.** ACEs after receiving different ICI treatments

|                      | Camrelizumab<br>(N=154)   | Pembrolizumab<br>(N=20) | Tislelizumab<br>(N=11) | Toripalimab<br>(N=7)  | Navulumab<br>(N=4)    | Sintilimab<br>(N=4)  | Durvalumab<br>(N=3) |
|----------------------|---------------------------|-------------------------|------------------------|-----------------------|-----------------------|----------------------|---------------------|
| Abnormal ECG         | 16/136 (miss 18)<br>11.8% | 5/17 (miss 3)<br>29.4%  | 2/10 (miss 1)<br>20.0% | 1/6 (miss 1)<br>16.7% | 1/4<br>25.0%          | 1/4<br>25.0%         | 0/3<br>0%           |
| Pericardial effusion | 3/153 (2.0%)              | 1/20 (5.0%)             | 0                      | 0                     | 1/4 (25.0%)           | 0                    | 0                   |
| NT-ProBNP abnormal   | 5/148 (miss 6)<br>3.4%    | 2/18 (miss 2)<br>11.1%  | 1/11<br>9.1%           | 0/5 (miss 2)<br>0.0%  | 2/3 (miss 1)<br>66.7% | 0/3 (miss 1)<br>0.0% | 0/3<br>0.0%         |
| Acute myocarditis    | 3/154 (1.9%)              | 0                       | 0                      | 0                     | 0                     | 0                    | 0                   |
| cTnT abnormal        | 8/153 (5.2%)              | 0                       | 1/12 (8.3%)            | 0                     | 0                     | 0                    | 0                   |

Abbreviations: ACEs, adverse cardiovascular events; ICI, immune checkpoint inhibitors; ECG, electrocardiogram; NT-ProBNP, N terminal pro B type natriuretic peptide; cTnT, cardiac troponin T.

**Supplementary Table 4.** ACEs in cancer patients of different stages after receiving ICI treatment

|                      | Stage 1 (N=10)     | Stage2 (N=27)       | Stage 3 (N=98)        | Stage 4 (N=69)       | P value |
|----------------------|--------------------|---------------------|-----------------------|----------------------|---------|
| Abnormal ECG         | 3/9 (miss 1) 33.3% | 3/24 (miss 3) 12.5% | 16/85 (miss 13) 18.8% | 16/62 (miss 7) 25.8% | 0.387*  |
| Pericardial effusion | 0                  | 1/27 (3.7%)         | 2/96 (miss 1) 2.1%    | 2/69 (2.9%)          | 0.874#  |
| NT-ProBNP abnormal   | 0/9 (miss 1)       | 3/26 (miss 1) 11.5% | 4/87 (miss 11) 4.6%   | 3/65 (miss 4) 4.6%   | 0.506#  |
| Acute myocarditis    | 0                  | 0                   | 1/98 (1.0%)           | 2/69 (2.9%)          | 0.571#  |
| cTnT abnormal        | 0                  | 0                   | 5/97 (miss1) 5.2%     | 4/69 (5.8%)          | 0.779#  |

Abbreviations: ACEs, adverse cardiovascular events; ICI, immune checkpoint inhibitors; ECG, electrocardiogram; NT-ProBNP, N terminal pro B type natriuretic peptide; cTnT, cardiac troponin T. \*Chi-square test or #Fisher's exact test for contingency table.
